# Supplementary material for: Accelerated screening of water-stable MOF structures using the digital reticular chemistry method
Source: Royal Society of Chemistry journal article supplement (doi:10.1039/d5ta01097g), 2025-01-01
Supplement: d5ta01097g1.pdf [file d5ta01097g1.pdf]

## **Supplementary Information**

### **Accelerated screening of water-stable MOF structures using digital reticular chemistry method**

Zeyang Song<sup>a</sup>, Shaopeng Lu<sup>a</sup>, Shanshan Cheng<sup>a</sup>, Haijian Li<sup>c</sup>, Hongyi Gao<sup>a\*</sup>, Zhimeng Liu<sup>a</sup>,  
Yuqiao Su<sup>a</sup>, Wenqing Li<sup>a</sup>, Yujing Ji<sup>a</sup>, Xu Jin<sup>b\*</sup>, Ge Wang<sup>a\*</sup>

<sup>a</sup> Beijing Advanced Innovation Center for Materials Genome Engineering, Beijing Key Laboratory of Function Materials for Molecule & Structure Construction, School of Materials Science and Engineering, University of Science and Technology Beijing, Beijing 100083 (China)

<sup>b</sup> Research Institute of Petroleum Exploration&Development, PetroChina, Beijing, 100083, PR China

<sup>c</sup> National Key laboratory of Energetic Materials, Xi'an Modern Chemistry Research Institute, Xi'an 710065, China

E-mail: [hygao@ustb.edu.cn](mailto:hygao@ustb.edu.cn) (H. Gao), [jinxu@petrochina.com.cn](mailto:jinxu@petrochina.com.cn) (X. Jin),  
[gewang@ustb.edu.cn](mailto:gewang@ustb.edu.cn) (G. Wang)

**Table S1.** Criteria for Water Stability Classifications.<sup>1</sup>

| Category                 | Criteria                                                                                                                                                                                   |
|--------------------------|--------------------------------------------------------------------------------------------------------------------------------------------------------------------------------------------|
| Thermodynamically stable | stable after long-term exposure to aqueous solutions: week or greater in pure water, day(s) in acidic/basic or boiling conditions<br><br>strong potential for a wide range of applications |
| High kinetic stability   | stable after exposure to high humidity conditions: decomposes after short exposure times in liquid water<br>strong potential for industrial applications with high humidity conditions     |
| Low kinetic stability    | stable under low humidity conditions<br><br>potential for applications with predried gas conditions                                                                                        |
| unstable                 | quickly breaks down after any moisture exposure<br><br>potential for applications under moisture-free conditions                                                                           |

**Table S2.** Examples of keywords used in string matching methods for locating water stability verification paragraphs.

| Keyword          | relevant description in the original literature                                                                                                            |
|------------------|------------------------------------------------------------------------------------------------------------------------------------------------------------|
| water            | as well as in boiling water for 24 h. The PXRD patterns of treated samples are well retained                                                               |
| aqueous          | maintain its crystallinity and structural integrity after exposure to air for 3months, or immersion in water and aqueous solutions of pH1 and 12 for 3days |
| stable           | sample was soaked in water for 5 days; the PXRD patterns demonstrated that its framework remained stable                                                   |
| humidity         | The results reveal that the structural integrity of TIFSIX-2-Cu-i was unaffected by humidity , as was the BET surface area                                 |
| H <sub>2</sub> O | Their frameworks remain stable under H <sub>2</sub> O for 2 months and in particular                                                                       |
| exposure         | retains high crystallinity and is resistant to water upon exposure to aqueous solutions                                                                    |
| collapse         | collapse to nonporous amorphous materials after water vapor isotherm                                                                                       |
| unstable         | loses crystallinity in water within minutes, loses crystallinity in air over several hours or days, desolvated sample unstable in air                      |
| vapor            | Full loss of BET surface area and loss of peaks in PXRD after vapor adsorption isotherm in air at 298 K.                                                   |

moisture the CO<sub>2</sub> uptakes were minimally affected by moisture exposure/ found to be unstable when exposed to moisture

**Table S3.** Data distribution of the combined dataset obtained according to the 3-class strategy.

|               | Stable(S) | High-stability (HS) | Low-stability (LS) |
|---------------|-----------|---------------------|--------------------|
| Category tags | 2         | 1                   | 0                  |
| Numbers       | 114       | 107                 | 90                 |

**Figure S1.** Data distribution of the combined dataset obtained according to the 3- and 2-class strategy.

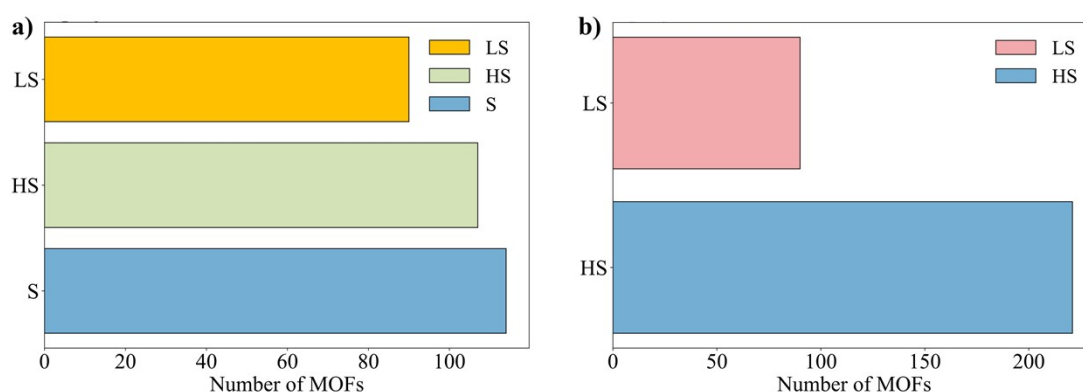

**Table S4.** Data distribution of the combined dataset obtained according to the 2-class strategy.

|               | High-stability (HS) | Low-stability (LS) |
|---------------|---------------------|--------------------|
| Category tags | 1                   | 0                  |
| Numbers       | 221                 | 90                 |

**Text S1.** Revised autocorrelation functions (RACs)<sup>2</sup> is an improved compact vector descriptor based on Autocorrelation functions (ACs), which is stable for different system sizes and compositions and does not change with the change of bond lengths and bond orders. RACs are based on different attribute values for each different connection depth of a particular molecular graph vertex, and the related formulas are shown in (1.1)~(1.4):

$$P_d^{f_{ax/eq}} = \frac{1}{|ax/eq \text{ ligands}|} \sum_i^{n_{ax/eq}} \sum_j^{n_{ax/eq}} P_i P_j \delta(d_{ij}, d) \quad \backslash * MERGEFORMAT (1.1)$$

$$P_d^{mc_{all}} = \sum_i^{mc} \sum_j^{all} P_i P_j \delta(d_{ij}, d) \quad \backslash * MERGEFORMAT (1.2)$$

$$P_d^{lc_{ax/eq}} = \frac{1}{|ax/eq \text{ ligands}|} \frac{1}{|lc|} \sum_i^{lc} \sum_j^{n_{ax/eq}} P_i P_j \delta(d_{ij}, d) \quad \backslash * MERGEFORMAT (1.3)$$

$$P_d^{lc/mc_{ax/eq/all}} = \sum_i^{lc/mc \text{ scope}} \sum_j (P_i - P_j) \delta(d_{ij}, d) \quad \backslash * MERGEFORMAT (1.4)$$

An example of a RAC descriptor: D-mc-Z-3-all is calculated based on the atomic nuclear charge number (-Z) property, using metal atoms as the starting atoms (-mc), with a maximum bonding depth of 3 (-3), covering all atoms within the entire unit cell (-all), and formulated as a "difference" (D-) type descriptor.

Schematic of RACs<sup>2</sup>

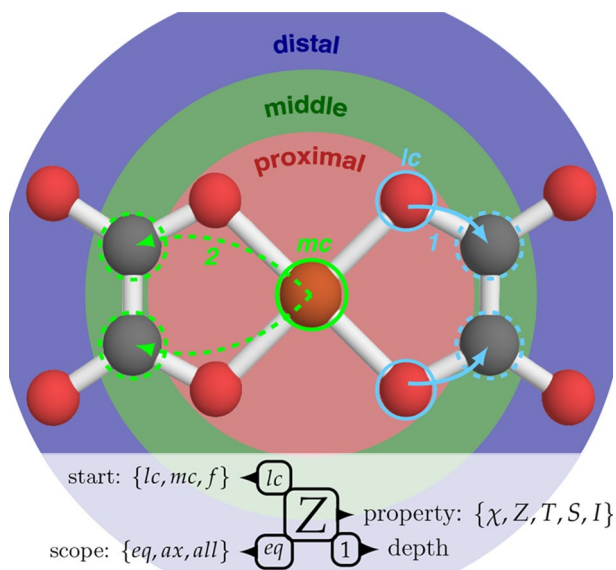

Five heuristic atomic properties are employed in this research : (i) nuclear charge, Z (ii) Pauling electronegativity,  $\chi$  (iii) topology(coordination number), T (iv) identity, I (v) covalent atomic radius, S. We apply these properties to the product and difference forms, respectively, and take the maximum depth of 3 to compute all RAC descriptors. In the case of linker connecting atom centered and functional group centered RACs, an additional atom-wise property polarizability ( $\alpha$ ) was considered.<sup>3</sup> A total of 176 RACs were generated, with the specific types and numbers shown in Table S5.

**Table S5.** The different kinds of RACs descriptors used in this study and their number.

| type of starting points         | type and number of descriptors |
|---------------------------------|--------------------------------|
| metal centered                  | 20 products, 20 differences    |
| functional group centered       | 24 products, 24 differences    |
| full                            | 20 products                    |
| full linker                     | 20 products                    |
| linker connecting atom centered | 24 products, 24 differences    |

**Text S2.** Smoothed Overlap of Atomic Positions (SOAP) is a descriptor that encodes geometrical regions of atoms by using local expansions of Gaussian-coated atomic densities and orthogonal functions based on spherical harmonic functions and radial basis functions. SOAP allows for quantification of similarity between atoms without being constrained by discretisation or specific coordination coefficients. Although the features of SOAP descriptors in each dimension do not have actual physical significance, their combined features can provide rich local structural information for machine learning models, thus improving the predictive performance of the models. The relevant formulas for the calculation of SOAP are shown in (1.5)~(1.8):

$$p_{nn'l}^{Z_1Z_2} = \pi \sqrt{\frac{8}{2l+1}} \sum_m c_{nlm}^{Z_1} * c_{nl'm}^{Z_2} \quad \backslash * MERGEFORMAT (1.5)$$

$$c_{nlm}^Z = \iiint_{R^3} dV g_n(r) Y_{lm}(\theta, \phi) \rho^Z(r) \quad \backslash * MERGEFORMAT (1.6)$$

$$\rho^Z(r) = \sum_i^{|Z_i|} e^{-1/2\sigma^2|r-R_i|^2} \quad \backslash * MERGEFORMAT (1.7)$$

$$K^{SOAP}(p, p') = \left( \frac{p \cdot p'}{\sqrt{p \cdot p p' \cdot p'}} \right)^\xi \quad \backslash * MERGEFORMAT (1.8)$$

The main parameters used in this study for generating SOAP descriptors by using DScibe 2.1.1 are shown in Table S6.

**Table S6.** The main parameters employed when generating SOAP descriptors by using DScibe 2.1.1.<sup>4</sup>

| r_cut(Å) | $\sigma$ | n_max | l_max | method | crossover |
|----------|----------|-------|-------|--------|-----------|
| 5.0      | 0.2      | 6     | 4     | inner  | False     |

**Text S3.** The Henry constant, which is used to describe the adsorption behaviour of a gas at low pressure on the surface of a material such as a MOF, is an important concept in the field of gas adsorption. It is derived from Henry's Law, which states that the solubility of a gas in a solid or liquid at low pressure is proportional to the partial pressure of the gas:

$$C = K_H \cdot P \quad \backslash * MERGEFORMAT (1.9)$$

The Henry constant characterises the adsorption behaviour of a material at lower gas partial pressures and is a quantitative indicator of the initial adsorption capacity. The magnitude of this value often implies the strength of water adsorption by the material. The main parameters used in this study for the calculation of Henry constant for the adsorption of water molecules by MOF using the Sorption module of Material Studio version 2019 are shown in Table S7.

**Table S7.** Main parameters employed for Henry constant calculations using the sorption module of Material Studio 2019.

|                         |                |                      |             |
|-------------------------|----------------|----------------------|-------------|
| <b>Task</b>             | Henry constant | <b>Forcefield</b>    | Universal   |
| <b>Method</b>           | Metropolis     | <b>Charges</b>       | Use current |
| <b>Production steps</b> | 100000         | <b>Electrostatic</b> | Ewald&Group |
| <b>Temperature</b>      | 298(constant)  | <b>Van der Waals</b> | Atom based  |

**Table S8.** The relevant parameters of the t-SNE algorithm and the UMAP algorithm used in this study. T-Distributed Stochastic Neighbor Embedding (t-SNE) is a probabilistic-based dimensionality reduction algorithm that is typically effective in capturing the local structure of the data and is therefore well-suited for the detection of details in local neighborhoods. The algorithm maps high-dimensional data into two- or three-dimensional space, with the objective of maintaining the similarity between the original data points in a low-dimensional space. It is typically effective in distinguishing complex data with nonlinear structure. Uniform Manifold Approximation and Projection (UMAP) is a topology-based dimensionality reduction algorithm that better preserves the global structure of the data while maintaining the relationships between local neighbouring points.

|              |                                                                                                                                                                                                                                                                                                                                    |
|--------------|------------------------------------------------------------------------------------------------------------------------------------------------------------------------------------------------------------------------------------------------------------------------------------------------------------------------------------|
| <b>t-SNE</b> | 'angle': 0.5, 'early_exaggeration': 12.0, 'init': 'pca', 'learning_rate': 'auto',<br>'method': 'barnes_hut', 'metric': 'euclidean', 'metric_params': None,<br>'min_grad_norm': 1e-07, 'n_components': 2, 'n_iter': 1000,<br>'n_iter_without_progress': 300, 'n_jobs': None, 'perplexity': 50, 'random_state':<br>123, 'verbose': 0 |
| <b>UMAP</b>  | 'a': None, 'angular_rp_forest': False, 'b': None, 'dens_frac': 0.3, 'dens_lambda':<br>2.0, 'dens_var_shift': 0.1, 'densmap': False, 'disconnection_distance': None,<br>'force_approximation_algorithm': False, 'init': 'spectral', 'learning_rate': 1.0,                                                                           |

---

```
'local_connectivity': 1.0, 'low_memory': True, 'metric': 'euclidean',  
'metric_kwds': None, 'min_dist': 0.1, 'n_components': 2, 'n_epochs': None,  
'n_jobs': -1, 'n_neighbors': 30, 'negative_sample_rate': 5, 'output_dens': False,  
'output_metric': 'euclidean', 'output_metric_kwds': None, 'precomputed_knn':  
(None, None, None), 'random_state': None, 'repulsion_strength': 1.0,  
'set_op_mix_ratio': 1.0, 'spread': 1.0, 'target_metric': 'categorical',  
'target_metric_kwds': None, 'target_n_neighbors': -1, 'target_weight': 0.5,  
'tqdm_kwds': {'desc': 'Epochs completed', 'bar_format': '{desc}:'  
{percentage:3.0f}%| {bar} {n_fmt}/{total_fmt} [{elapsed}]', 'disable': True},  
'transform_mode': 'embedding', 'transform_queue_size': 4.0, 'transform_seed':  
42, 'unique': False, 'verbose': False
```

---

**Figure S2.** T-SNE plot and UMAP plot for dimensionality reduction of the original dataset under 2-class strategy. **b)** t-SNE plot and UMAP plot for dimensionality reduction of the original dataset under 3-class strategy.

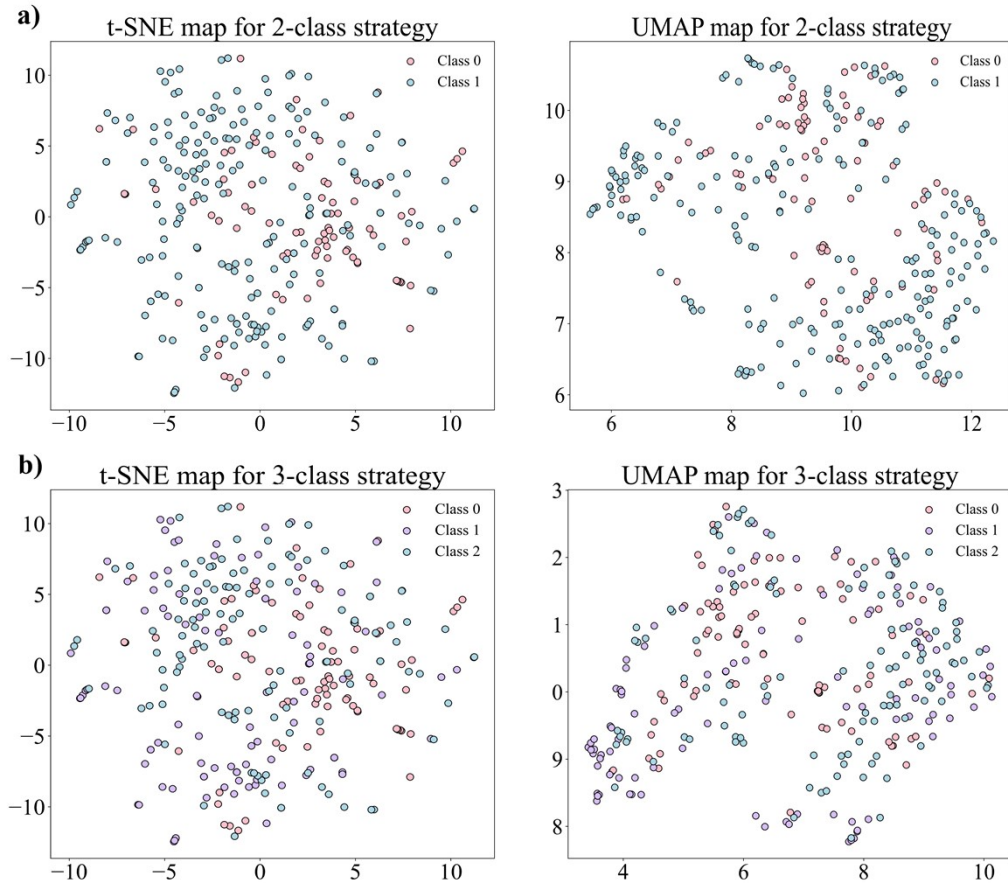

**Table S9.** 2-class models trained using the PyCaret workflow on the dataset after dimensionality reduction using the RFECV algorithm and their performance (performance is sorted from high to low, only the top five are shown).

|                 | <b>Model</b>                    | <b>Accuracy</b> | <b>AUC</b> | <b>Recall</b> | <b>Prec.</b> | <b>F1</b> |
|-----------------|---------------------------------|-----------------|------------|---------------|--------------|-----------|
| <b>et</b>       | Extra Trees Classifier          | 0.8571          | 0.8687     | 0.9479        | 0.8661       | 0.9038    |
|                 | Extreme Gradient Boosting       | 0.8522          | 0.8524     | 0.9471        | 0.8595       | 0.9006    |
| <b>xgboost</b>  | CatBoost Classifier             | 0.8431          | 0.8781     | 0.9413        | 0.8539       | 0.8944    |
| <b>rf</b>       | Random Forest Classifier        | 0.8340          | 0.8555     | 0.9283        | 0.8522       | 0.8876    |
| <b>lightgbm</b> | Light Gradient Boosting Machine | 0.8108          | 0.8455     | 0.8958        | 0.8469       | 0.8687    |
|                 |                                 |                 |            |               |              |           |

**Table S10.** 3-class models trained using the PyCaret workflow on the dataset after dimensionality reduction using the RFECV algorithm and their performance (performance is sorted from high to low, only the top five are shown).

|                 | <b>Model</b>                    | <b>Accuracy</b> | <b>AUC</b> | <b>Recall</b> | <b>Prec.</b> | <b>F1</b> |
|-----------------|---------------------------------|-----------------|------------|---------------|--------------|-----------|
| <b>rf</b>       | Random Forest Classifier        | 0.6686          | 0.8380     | 0.6686        | 0.6961       | 0.6628    |
|                 | Gradient Boosting Classifier    | 0.6502          | 0.8223     | 0.6502        | 0.6657       | 0.6471    |
| <b>gbc</b>      | Light Gradient Boosting Machine | 0.6498          | 0.8266     | 0.6498        | 0.6772       | 0.6440    |
| <b>lightgbm</b> |                                 |                 |            |               |              |           |



|                 |                        |        |        |        |        |        |
|-----------------|------------------------|--------|--------|--------|--------|--------|
| <b>et</b>       | Extra Trees Classifier | 0.6455 | 0.8312 | 0.6455 | 0.6874 | 0.6412 |
| <b>catboost</b> | CatBoost Classifier    | 0.6455 | 0.8394 | 0.6455 | 0.6815 | 0.6381 |

**Table S11.** 2-class models trained using the PyCaret workflow on the dataset after dimensionality reduction using the PCA algorithm and their performance (performance is sorted from high to low, only the top five are shown).

|                 | <b>Model</b>                    | <b>Accuracy</b> | <b>AUC</b> | <b>Recall</b> | <b>Prec.</b> | <b>F1</b> |
|-----------------|---------------------------------|-----------------|------------|---------------|--------------|-----------|
| <b>catboost</b> | CatBoost Classifier             | 0.8247          | 0.8312     | 0.9871        | 0.8091       | 0.8888    |
| <b>xgboost</b>  | Extreme Gradient Boosting       | 0.8197          | 0.8447     | 0.9275        | 0.8409       | 0.8798    |
| <b>rf</b>       | Random Forest Classifier        | 0.8065          | 0.7896     | 0.9871        | 0.7936       | 0.8788    |
| <b>et</b>       | Extra Trees Classifier          | 0.8065          | 0.8154     | 0.9812        | 0.7970       | 0.8784    |
| <b>lightgbm</b> | Light Gradient Boosting Machine | 0.8050          | 0.8440     | 0.9275        | 0.8216       | 0.8694    |

**Table S12.** 3-class models trained using the PyCaret workflow on the dataset after dimensionality reduction using the PCA algorithm and their performance (performance is sorted from high to low, only the top five are shown).

|                 | <b>Model</b>        | <b>Accuracy</b> | <b>AUC</b> | <b>Recall</b> | <b>Prec.</b> | <b>F1</b> |
|-----------------|---------------------|-----------------|------------|---------------|--------------|-----------|
| <b>catboost</b> | CatBoost Classifier | 0.5942          | 0.7424     | 0.5942        | 0.6151       | 0.5772    |

|                 |                                 |        |        |        |        |        |
|-----------------|---------------------------------|--------|--------|--------|--------|--------|
|                 | Extreme                         |        |        |        |        |        |
| <b>xgboost</b>  | Gradient Boosting               | 0.5935 | 0.7259 | 0.5935 | 0.5964 | 0.5818 |
| <b>et</b>       | Extra Trees Classifier          | 0.5617 | 0.7400 | 0.5617 | 0.5796 | 0.5541 |
| <b>lightgbm</b> | Light Gradient Boosting Machine | 0.5385 | 0.7086 | 0.5385 | 0.5599 | 0.5280 |
| <b>rf</b>       | Random Forest Classifier        | 0.5342 | 0.7170 | 0.5342 | 0.5702 | 0.5239 |

---

**Text S4.** Specific formula for the metrics used to assess model performance and their meanings.

**Accuracy:** The proportion of correctly classified samples among the total samples.

$$Accuracy = \frac{TP + TN}{TP + TN + FP + FN} \quad \backslash * MERGEFORMAT (1.10)$$

**AUC (Area Under the Curve):** Represents the area under the ROC curve, showing the model's ability to distinguish between classes. AUC does not have a simple formula as it is computed by integrating the ROC curve, which plots the True Positive Rate (TPR) against the False Positive Rate (FPR) at various threshold levels.

**Recall (Sensitivity or True Positive Rate):** The ability of the model to identify all positive samples.

$$Recall = \frac{TP}{TP + FN} \quad \backslash * MERGEFORMAT (1.11)$$

**Precision:** The proportion of true positive predictions among all positive predictions made by the model.

$$Precision = \frac{TP}{TP + FP} \quad \backslash * MERGEFORMAT (1.12)$$

**F1 Score:** The harmonic mean of Precision and Recall, providing a balance between the two, especially when there is an uneven class distribution.

$$F1 = \frac{2 * Precision * Recall}{Precision + Recall} \quad \backslash * MERGEFORMAT (1.13)$$

**True Positive (TP):** The number of instances where the model correctly predicts the positive class. This means that a sample that is actually positive is correctly classified as positive.

**True Negative (TN):** The number of instances where the model correctly predicts the negative class. This indicates that a sample that is actually negative is correctly classified as negative.

**False Positive (FP):** The number of instances where the model incorrectly predicts the positive class. In this case, a sample that is actually negative is mistakenly classified as positive.

**False Negative (FN):** The number of instances where the model incorrectly predicts the negative class. Here, a sample that is actually positive is wrongly classified as negative.

**Figure S3.** ROC curves of a) 2-class ETC model and b) 3-class RF model based on the reduced dataset using the RFECV algorithm.

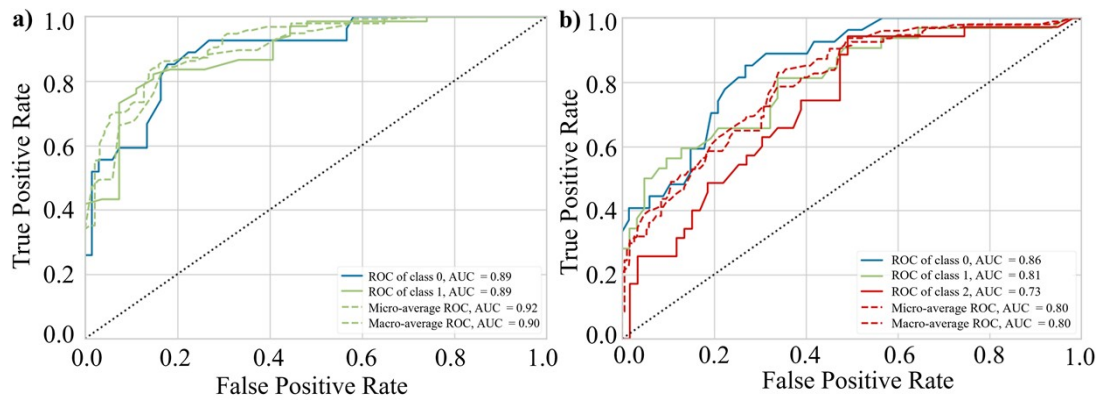

**Table S13.** The parameter grid used for hyperparametric tuning.

| Parameter         | Value                              |
|-------------------|------------------------------------|
| n_estimators      | 100,300,500,700,800,900, 1200,1300 |
| max_features      | 'log2', 'sqrt', 0.5,0.6, 0.7,0.8   |
| max_depth         | None, 5,10, 15,20                  |
| min_samples_split | 2, 5, 10, 15, 20                   |
| min_samples_leaf  | 1, 2, 4, 6, 8, 10                  |
| bootstrap         | True, False                        |

**Figure S4.** a) ROC curves of the optimal hyperparameter-based 2-class ETC model on the test set, the ROC curves of all categories show that the model exhibits good performance at different thresholds. b) Confusion matrix of the optimal hyperparameter-based 2-class ETC model on

the test set, where 88% of the data points are correctly classified.

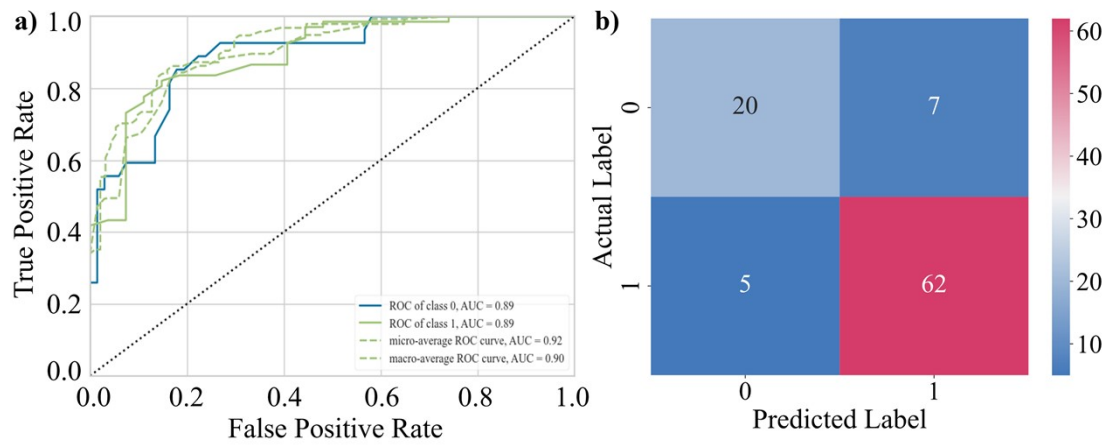

**Table S14.** Optimal hyperparameter combinations for the 2-class ETC model after hyperparameter tuning.

| hyperparameter               | Value | hyperparameter                  | Value |
|------------------------------|-------|---------------------------------|-------|
| <b>bootstrap</b>             | FALSE | <b>min_samples_leaf</b>         | 1     |
| <b>ccp_alpha</b>             | 0     | <b>min_samples_split</b>        | 2     |
| <b>class_weight</b>          | None  | <b>min_weight_fraction_leaf</b> | 0     |
| <b>criterion</b>             | gini  | <b>n_estimators</b>             | 100   |
| <b>max_depth</b>             | None  | <b>n_jobs</b>                   | -1    |
| <b>max_features</b>          | sqrt  | <b>oob_score</b>                | False |
| <b>max_leaf_nodes</b>        | None  | <b>random_state</b>             | 123   |
| <b>max_samples</b>           | None  | <b>verbose</b>                  | 0     |
| <b>min_impurity_decrease</b> | 0     | <b>warm_start</b>               | False |

**Table S15.** Optimal hyperparameter combinations for the 3-class ETC model after hyperparameter tuning.

| hyperparameter               | Value | hyperparameter                  | Value |
|------------------------------|-------|---------------------------------|-------|
| <b>bootstrap</b>             | FALSE | <b>min_samples_leaf</b>         | 1     |
| <b>ccp_alpha</b>             | 0     | <b>min_samples_split</b>        | 2     |
| <b>class_weight</b>          | None  | <b>min_weight_fraction_leaf</b> | 0     |
| <b>criterion</b>             | gini  | <b>n_estimators</b>             | 1200  |
| <b>max_depth</b>             | 10    | <b>n_jobs</b>                   | None  |
| <b>max_features</b>          | sqrt  | <b>oob_score</b>                | False |
| <b>max_leaf_nodes</b>        | None  | <b>random_state</b>             | 0     |
| <b>max_samples</b>           | None  | <b>verbose</b>                  | 0     |
| <b>min_impurity_decrease</b> | 0     | <b>warm_start</b>               | False |

**Figure S5.** Partial Dependency Plot (PDP) of the 3 most important features selected by the feature\_importances\_ parameter of the 3-class ETC model.

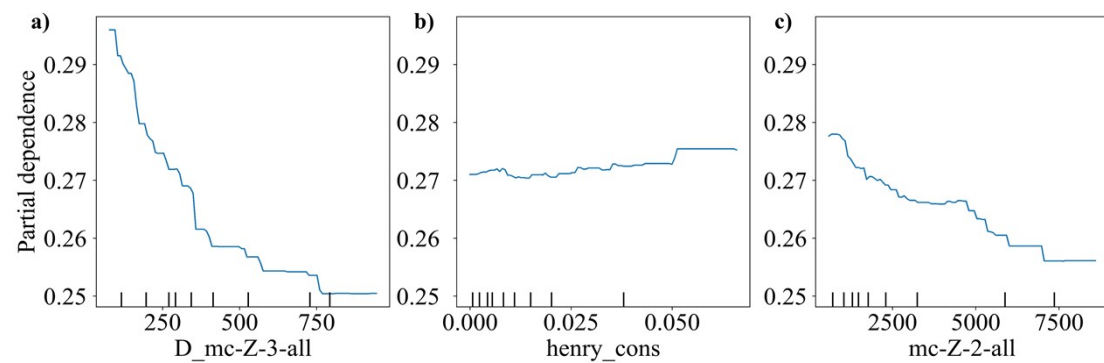

**Figure S6.** Kernel density estimation plots of MOF water stability for a) **D\_mc-Z-3-all** and b) **mc-Z-2-all**.

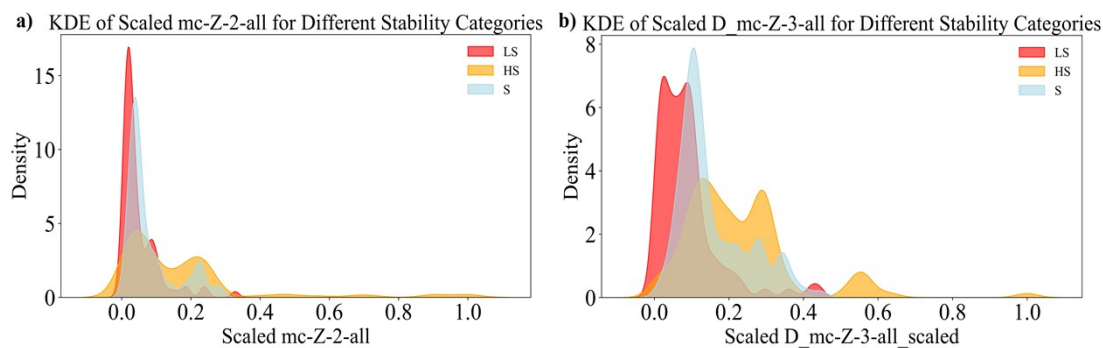

**Table S16.** Comparison of predicted labels with true labels. The predicted labels are the result of the prediction using the 3-class ETC model on the validation set.

| filename | prediction | true |
|----------|------------|------|
| BIQHIU   | 0          | 1    |
| CAVRAU   | 0          | 0    |
| EWSEF    | 1          | 2    |
| FUYCAF   | 1          | 1    |
| GUCTAB   | 1          | 2    |
| HUFKOK   | 2          | 2    |
| IXIKOR   | 1          | 2    |
| KUMGIK   | 0          | 0    |
| KUMGOQ   | 0          | 0    |
| LAFFEG   | 2          | 2    |
| ONOCOK   | 0          | 0    |
| RUYVIS   | 1          | 2    |
| SOYWOT   | 0          | 2    |
| WUHCUZ   | 1          | 1    |
| YEZKIZ   | 2          | 2    |
| ADABUE   | 2          | 2    |
| AVIPAX   | 0          | 0    |

|          |   |   |
|----------|---|---|
| AVIPEB   | 0 | 0 |
| BAFCAP   | 0 | 1 |
| BICPOT   | 0 | 0 |
| CIMTEZ   | 2 | 2 |
| EDOVEA   | 1 | 1 |
| ELEREU   | 2 | 2 |
| ELEROE   | 0 | 1 |
| EZIMIK   | 0 | 0 |
| EZOGAC   | 0 | 0 |
| FUJCOC01 | 0 | 0 |
| GUVCIJ   | 0 | 0 |
| GUVCOP   | 0 | 0 |
| HOHMIB   | 1 | 1 |
| HOWROC   | 0 | 0 |
| IQECIS   | 2 | 2 |
| JOFZOV   | 1 | 1 |
| JUMZOI   | 2 | 2 |
| JUMZUO01 | 2 | 2 |
| KUFTAI   | 2 | 2 |
| LATCAN   | 2 | 2 |
| LULWUL   | 0 | 0 |
| NABMUA01 | 0 | 0 |
| OLUHAG   | 0 | 1 |
| OSAVEK   | 0 | 0 |
| OSAVIO   | 0 | 0 |
| OSAVOU   | 0 | 0 |
| OSAVUA   | 0 | 0 |
| OSAWEL   | 0 | 0 |
| OTENEH   | 1 | 1 |
| PAFXUS   | 2 | 2 |
| PORLAL   | 2 | 2 |

---

|        |   |   |
|--------|---|---|
| PUJJEL | 2 | 2 |
| PURNAT | 1 | 1 |
| PURNEX | 1 | 1 |
| PURNIB | 1 | 1 |
| PURNOH | 1 | 1 |
| QIFLOI | 2 | 2 |
| QIFLUO | 2 | 2 |
| RORJOZ | 2 | 2 |
| RUJGIN | 0 | 0 |
| RUVMIF | 1 | 1 |
| RUYQIN | 2 | 2 |
| RUYVEO | 2 | 2 |
| SENWAL | 0 | 0 |
| SENWEP | 0 | 0 |
| SENWIT | 0 | 0 |
| SENWOZ | 0 | 0 |
| SUTJEY | 2 | 2 |
| SUTJOI | 2 | 2 |
| TIDSEE | 0 | 0 |
| TIFBEP | 0 | 0 |
| TIFCAM | 0 | 0 |
| TILBOH | 1 | 1 |
| UGOCAW | 1 | 2 |
| VAGMAT | 0 | 1 |
| WAJHUM | 0 | 0 |
| WEHPIJ | 0 | 0 |
| WUPTUY | 1 | 2 |
| WUPVAG | 1 | 1 |
| WUTBAQ | 1 | 2 |
| WUTBEU | 2 | 2 |
| YOZROW | 0 | 0 |

---



**Figure S7.** Learning curves for training set fraction of 2- and 3-class models. (Random Forest Classifier based)

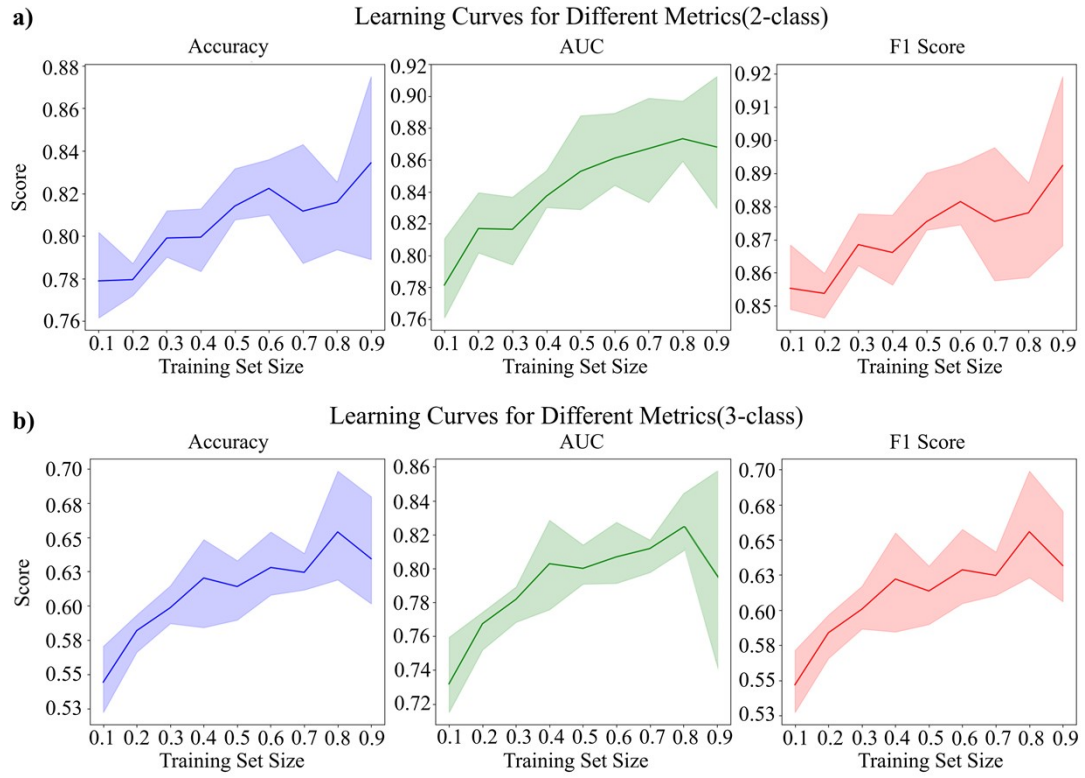

**Figure S8.** Boxplots for training set fraction of 2- and 3-class models. (Random Forest Classifier based)

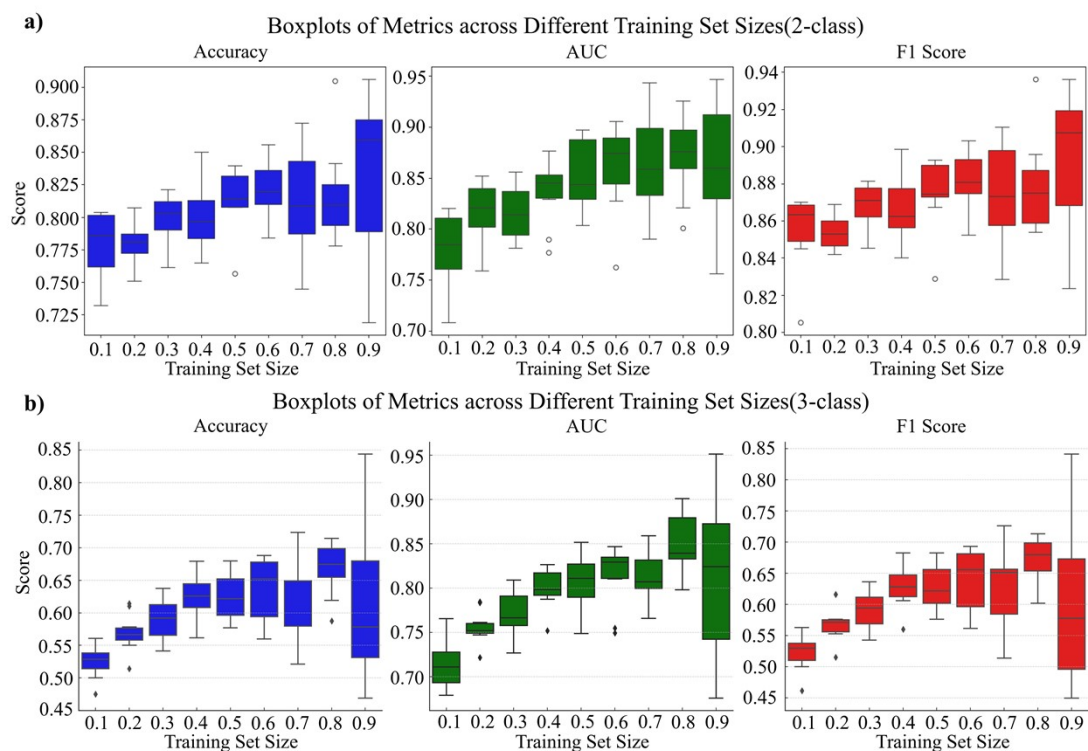

**Figure S9.** The treemap of the metal composition of the MOFs predicted to be water stable, where different colors represent different Lewis acid classes and the size of the rectangle represents the proportion of the corresponding category in all stable MOFs.

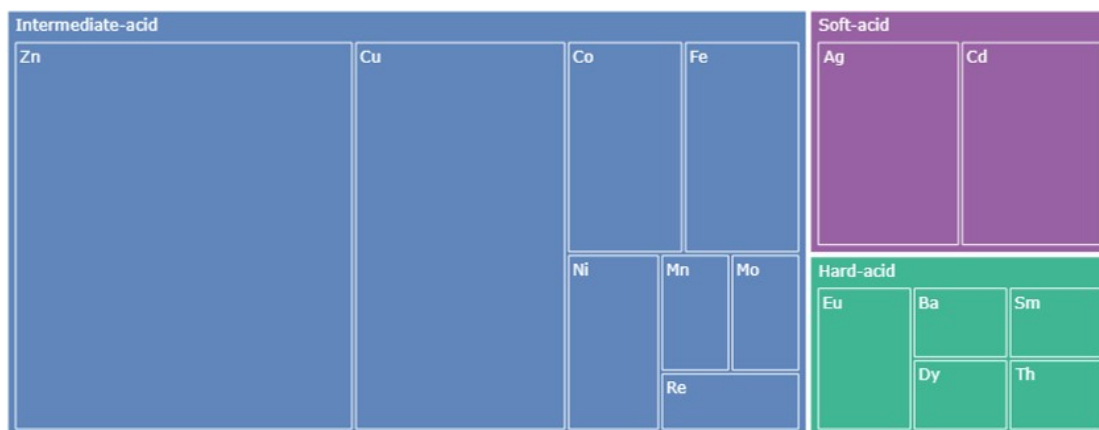

**Figure S10.** Photographs of the samples at different stages: **a)** as synthesized **b)** during soaking and **c)** after drying.

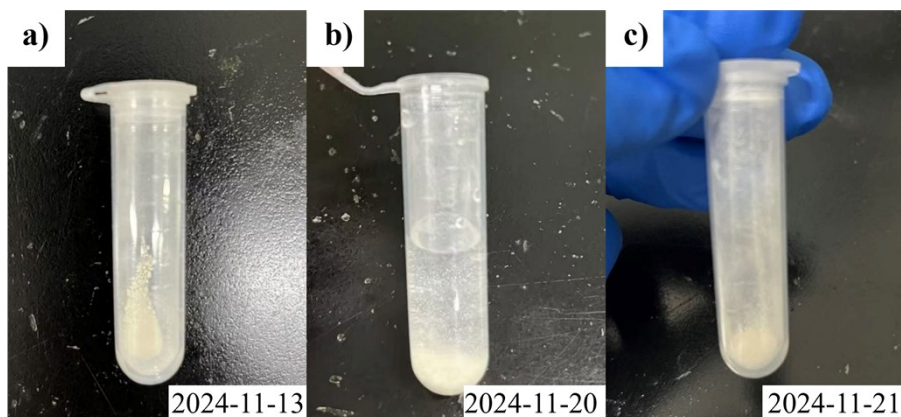

**Table S17.** Structural composition of MOFs predicted to be in the stable class and their possible directions of application or structural properties.

| MOF    | Unit cell                                                                           | Metal | Application/Properties                      | Source                  |
|--------|-------------------------------------------------------------------------------------|-------|---------------------------------------------|-------------------------|
| HUWHOY | 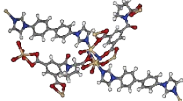  | Cd    | homochiral metal–organic frameworks (HMOFs) | 10.1021/acs.cgd.5b01359 |
| HUVNAP |  | Ba/Fe | visible-light irradiation                   | 10.1021/acs.cgd.5b00925 |
| HUWDEJ |  | Ag/Re | harvesting solar energy                     | 10.1021/ic901749r       |
| HUWLUI |  | Th    | centrosymmetric                             | 10.1039/C5DT03363B      |
| IBICON |  | Zn    | proton conductors                           | 10.1021/ja2078637       |

|        |                                                                                     |    |                                                                                   |                                                               |
|--------|-------------------------------------------------------------------------------------|----|-----------------------------------------------------------------------------------|---------------------------------------------------------------|
| IBUYAH | 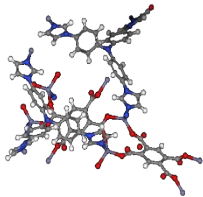   | Zn | photoluminescent                                                                  | 10.1039/C1C<br>E05889D                                        |
| ICIZAV |    | Cu | Catalysis<br>,molecular recognition<br>,ion exchanging<br>,nonlinear optics       | 10.1021/ic010<br>609g                                         |
| IFENOY |    | Zn | anisotropic thermal<br>expansion                                                  | 10.1021/ja401<br>671p                                         |
| IQEKOG |    | Zn | Luminescence                                                                      | 10.1016/j.inoc<br>he.2016.06.03<br>2                          |
| KESBOA |  | Ag | strong optical<br>absorptions<br>potential for the<br>synthesis of chiral<br>MOFs | 10.1021/ja064<br>5483                                         |
| KESBUG |  | Ag | strong optical<br>absorptions<br>potential for the<br>synthesis of chiral<br>MOFs | 10.1021/ja064<br>5483                                         |
| KESGAS |  | Mn | magnetic properties                                                               | 10.1080/1553<br>3174.2012.65<br>4878                          |
| KETHEY |  | Cd | photoluminescence                                                                 | 10.1080/0095<br>8972.2012.74<br>2890                          |
| LUDTUZ |  | Zn | has elastic properties<br>while remaining<br>crystalline                          | 10.1002/1521<br>-<br>3773(200209<br>16)41:18%3C<br>3392::AID- |

|        |                                                                                     |    |                                                          |                                                                            |
|--------|-------------------------------------------------------------------------------------|----|----------------------------------------------------------|----------------------------------------------------------------------------|
|        |                                                                                     |    |                                                          | ANIE3392%3<br>E3.0.CO;2-V                                                  |
|        |                                                                                     |    |                                                          | 10.1002/1521                                                               |
| LUDVAH | 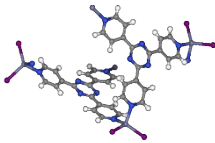   | Zn | has elastic properties<br>while remaining<br>crystalline | -<br>3773(200209<br>16)41:18%3C<br>3392::AID-<br>ANIE3392%3<br>E3.0.CO;2-V |
|        |                                                                                     |    |                                                          | 10.1002/1521                                                               |
| LUDVEL |    | Zn | has elastic properties<br>while remaining<br>crystalline | -<br>3773(200209<br>16)41:18%3C<br>3392::AID-<br>ANIE3392%3<br>E3.0.CO;2-V |
|        |                                                                                     |    |                                                          | 10.1002/1521                                                               |
| LUDVIP |   | Zn | has elastic properties<br>while remaining<br>crystalline | -<br>3773(200209<br>16)41:18%3C<br>3392::AID-<br>ANIE3392%3<br>E3.0.CO;2-V |
|        |                                                                                     |    |                                                          | 10.1002/1521                                                               |
| LUDVOV |  | Zn | has elastic properties<br>while remaining<br>crystalline | -<br>3773(200209<br>16)41:18%3C<br>3392::AID-<br>ANIE3392%3<br>E3.0.CO;2-V |
|        |                                                                                     |    |                                                          | 10.1002/1521                                                               |
| LUDVUB |  | Zn | has elastic properties<br>while remaining<br>crystalline | -<br>3773(200209<br>16)41:18%3C<br>3392::AID-<br>ANIE3392%3<br>E3.0.CO;2-V |
|        |                                                                                     |    |                                                          | 10.1002/1521                                                               |
| LUFBUL |  | Cu | catalysis                                                | 10.4236/ojic.2<br>012.23009                                                |

|        |                                                                                     |    |                                                                          |                                |
|--------|-------------------------------------------------------------------------------------|----|--------------------------------------------------------------------------|--------------------------------|
| MAPLEX | 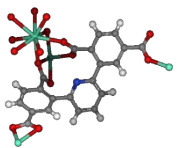   | Eu | multifunctional<br>chemosensor/luminescent probe for diethyl ether vapor | 10.1039/C7TC00508C             |
| MAQMEZ |    | Zn | luminescence                                                             | 10.1016/j.molstruc.2017.04.057 |
| MARKOF |    | Cd | catalysis                                                                | 10.1021/ja991698n              |
| MARLAS |    | Cd | catalysis                                                                | 10.1021/ja991698n              |
| MARNUR |   | Co | magnetic properties                                                      | 10.1016/j.jssc.2017.09.023     |
| MARNOL |  | Zn | gas storage and separation                                               | 10.1016/j.jssc.2017.09.023     |
| MECWIB |  | Zn | high thermal stability                                                   | 10.1002/anie.200503778         |
| MECWOH |  | Zn | high thermal stability                                                   | 10.1002/anie.200503778         |
| NETYIV |  | Cu | catalysis                                                                | 10.1002/ejic.200600558         |

|          |                                                                                     |       |                        |                               |
|----------|-------------------------------------------------------------------------------------|-------|------------------------|-------------------------------|
| NEYVEU   | 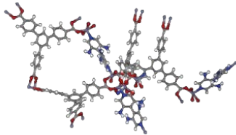   | Zn    | selective sensing      | 10.1039/C2DT30689A            |
| OMUMEQ   |    | Eu    | ion sensor             | 10.1021/acs.inorgchem.6b00190 |
| OMUMIU   |    | Dy    | Magnetic properties    | 10.1021/acs.inorgchem.6b00190 |
| ONAWAC   |   | Cu    | catalysis              | 10.1016/j.ica.2011.01.052     |
| ONAWEG   |  | Cu    | catalysis              | 10.1016/j.ica.2011.01.052     |
| ONAWEG01 |  | Cu    | catalysis              | 10.1016/j.ica.2011.01.052     |
| ONAWEG02 |  | Cu    | high thermal stability | 10.1080/00958972.2012.726713  |
| PAQTIM   |  | Ni/Fe | catalytic              | 10.1021/cm2025747             |
| PAQTOS   |  | Ni/Fe | catalytic              | 10.1021/cm2025747             |

|        |                                                                                     |       |              |                                        |
|--------|-------------------------------------------------------------------------------------|-------|--------------|----------------------------------------|
| PEBNEP | 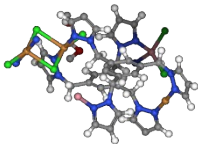   | Cu/Co | catalytic    | 10.1039/DT9<br>930000687               |
| PECBOQ |    | Cu/Mo | catalytic    | 10.1016/j.ica.<br>2012.01.011          |
| PECMOB |    | Sm/Co | catalytic    | 10.1524/ncrs.<br>2012.0096             |
| PEDMOB |  | Cu    | catalytic    | 10.1021/ic050<br>9377                  |
| VOXQOQ |  | Zn    | luminescence | 10.1016/j.mol<br>struc.2014.12.<br>077 |
| VOYLUS |  | Ag    | luminescence | 10.1016/j.pol<br>y.2014.11.024         |

The relevant datasets and codes used in this study have been uploaded to <https://github.com/coco550/Water-stability/tree/main>.



## References

1. Burtch, N.C., Jasuja, H., and Walton, K.S. (2014). Water Stability and Adsorption in Metal–Organic Frameworks. *Chem. Rev.* *114*, 10575–10612. <https://doi.org/10.1021/cr5002589>.
2. Janet, J.P., and Kulik, H.J. (2017). Resolving Transition Metal Chemical Space: Feature Selection for Machine Learning and Structure–Property Relationships. ACS Publications. <https://doi.org/10.1021/acs.jpca.7b08750>.
3. Moosavi, S.M., Nandy, A., Jablonka, K.M., Ongari, D., Janet, J.P., Boyd, P.G., Lee, Y., Smit, B., and Kulik, H.J. (2020). Understanding the diversity of the metal-organic framework ecosystem. *Nat Commun* *11*, 4068. <https://doi.org/10.1038/s41467-020-17755-8>.
4. Laakso, J., Himanen, L., Homm, H., Morooka, E.V., Jäger, M.O.J., Todorović, M., and Rinke, P. (2023). Updates to the DScribe library: New descriptors and derivatives. *The Journal of Chemical Physics* *158*, 234802. <https://doi.org/10.1063/5.0151031>.
